# Supplementary material for: The reactivity of stoichiometric tungsten oxide clusters towards carbon monoxide: the effects of cluster sizes and charge states
Source: Royal Society of Chemistry journal article supplement (doi:10.1039/c5cp00529a), 2015-01-01
Supplement: c5cp00529a1.pdf [file c5cp00529a1.pdf]

## Electronic Supplementary Information

### Reactivity of stoichiometric tungsten oxide clusters towards carbon monoxide: the effects of cluster size and charge state

Shu-Juan Lin<sup>a</sup>, Jing Cheng<sup>a</sup>, Chang-Fu Zhang<sup>a</sup>, Bin Wang<sup>a</sup>, Yong-Fan Zhang<sup>a,b\*</sup>, Xin Huang<sup>a,b\*</sup>

<sup>a</sup>College of Chemistry, Fuzhou University, Fuzhou, Fujian 350116, P. R. China, and <sup>b</sup>Fujian Provincial Key Laboratory of Theoretical and Computational Chemistry, Xiamen, Fujian 361005, P. R. China

\*Corresponding author. Tel.: +86 591 22866139; fax: +86 591 22866156.

E-mail address: [zhangyf@fzu.edu.cn](mailto:zhangyf@fzu.edu.cn) (Y. -F. Zhang); [xhuang@fzu.edu.cn](mailto:xhuang@fzu.edu.cn) (X. Huang)

**Figure S1** B3LYP optimized structures for the intermediates, transition states and the product shown in the energy profile of Figure 4. The relative energies (eV) take  $\text{WO}_3^+ + \text{CO}$  as the reference.

**Figure S2** B3LYP optimized structures for the intermediates, transition states and the product shown in the energy profile of Figure 5. The relative energies (eV) take  $\text{W}_2\text{O}_6^+ + \text{CO}$  as the reference.

**Figure S3** B3LYP optimized structures for the intermediates, transition states and the product shown in the energy profile of Figure 6. The relative energies (eV) take  $\text{W}_3\text{O}_9^+ + \text{CO}$  as the reference.

**Figure S4** B3LYP optimized structures for the intermediates, transition states and the product shown in the energy profile of Figure 7. The relative energies (eV) take  $\text{W}_4\text{O}_{12}^+ + \text{CO}$  as the reference.

**Figure S5** B3LYP optimized structures for the reactant, intermediates, transition states and the product shown in the energy profile of Figure 8. The relative energies (eV) take  $\text{WO}_3 + \text{CO}$  as the reference.

**Figure S6** B3LYP optimized structures for the reactant, intermediates, transition states and the product shown in the energy profile of Figure 9. The relative energies (eV) take  $\text{WO}_3^- + \text{CO}$  as the reference.

**Figure S7** Numerical electron spin density (in  $|e|$ ) for the reactant, intermediates, transition states and the product shown in the energy profile of Figure 4.

**Figure S8** Numerical electron spin density (in  $|e|$ ) for the reactant, intermediates, transition states and the product shown in the energy profile of Figure 5.

**Figure S9** Numerical electron spin density (in  $|e|$ ) for the reactant, intermediates, transition states and the product shown in the energy profile of Figure 6.

**Figure S10** Numerical electron spin density (in  $|e|$ ) for the reactant, intermediates, transition states and the product shown in the energy profile of Figure 7.

**TABLE S1** Cartesian coordinates for the reactant, intermediates, transition states and the product shown in the energy profile of Figure 4 at B3LYP level.

**TABLE S2** Cartesian coordinates for the reactant, intermediates, transition states and the product shown in the energy profile of Figure 5 at B3LYP level.

**TABLE S3** Cartesian coordinates for the reactant, intermediates, transition states and the product shown in the energy profile of Figure 6 at B3LYP level.

**TABLE S4** Cartesian coordinates for the reactant, intermediates, transition states and the product shown in the energy profile of Figure 7 at B3LYP level.

**TABLE S5** Cartesian coordinates for the reactant, intermediates, transition states and the product shown in the energy profile of Figure 8 at B3LYP level.

**TABLE S6** Cartesian coordinates for the reactant, intermediates, transition states and the product shown in the energy profile of Figure 9 at B3LYP level.

**Figure S1** B3LYP optimized structures intermediates, transition states and the product shown in the energy profile of Figure 4. The relative energies (eV) take  $\text{WO}_3^+ + \text{CO}$  as the reference.

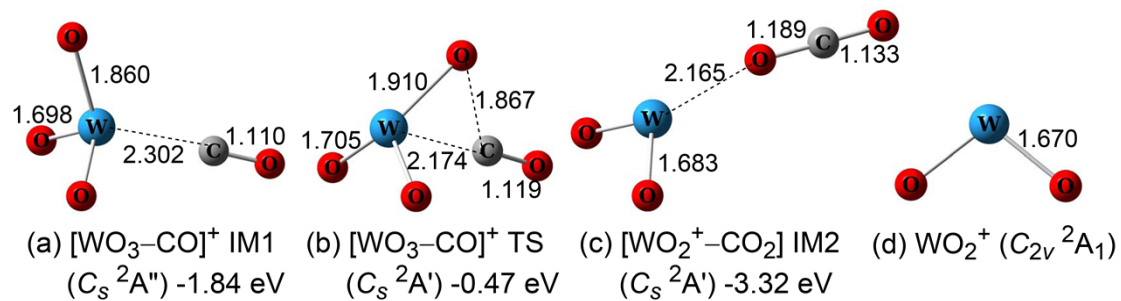

**Figure S2** B3LYP optimized structures for the intermediates, transition states and the product shown in the energy profile of Figure 5. The relative energies (eV) take  $W_2O_6^+ + CO$  as the reference.

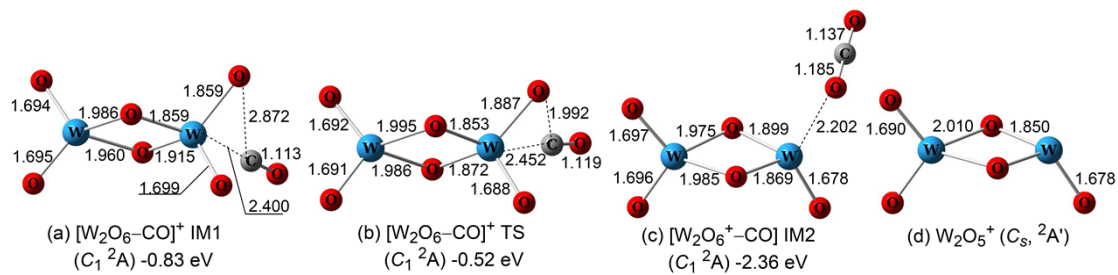

**Figure S3** B3LYP optimized structures for the intermediates, transition states and the product shown in the energy profile of Figure 6. The relative energies (eV) take  $W_3O_9^+ + CO$  as the reference.

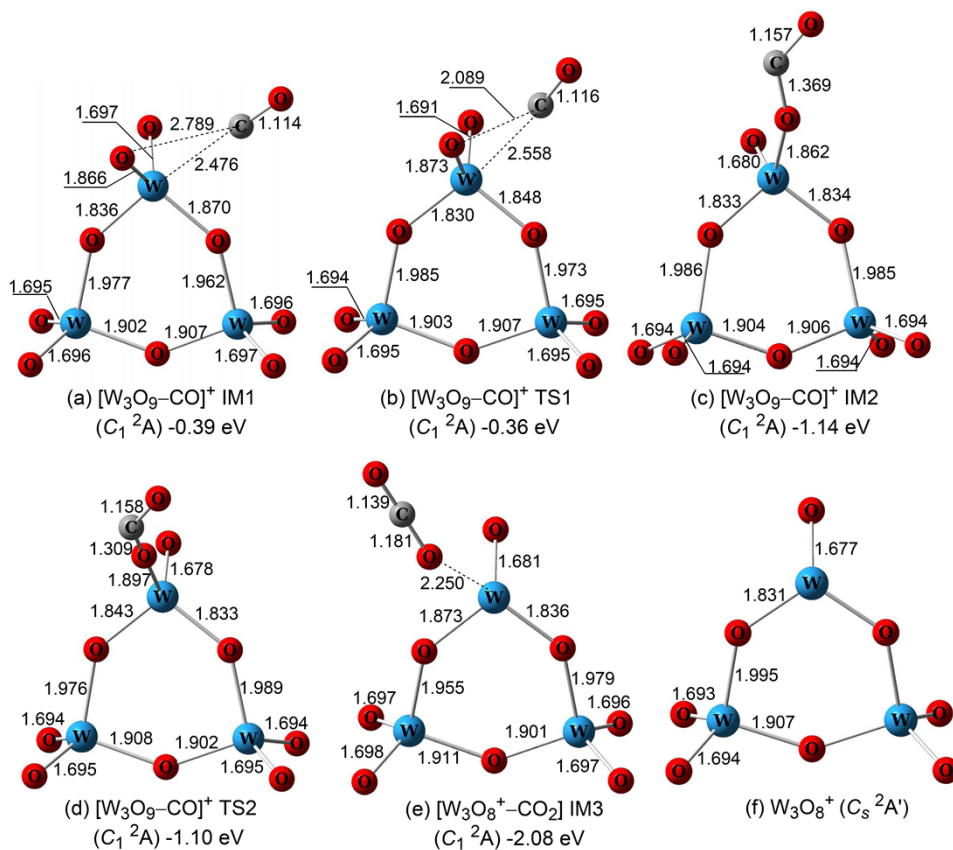

**Figure S4** B3LYP optimized structures for the intermediates, transition states and the product shown in the energy profile of Figure 7. The relative energies (eV) take  $W_4O_{12}^+ + CO$  as the reference.

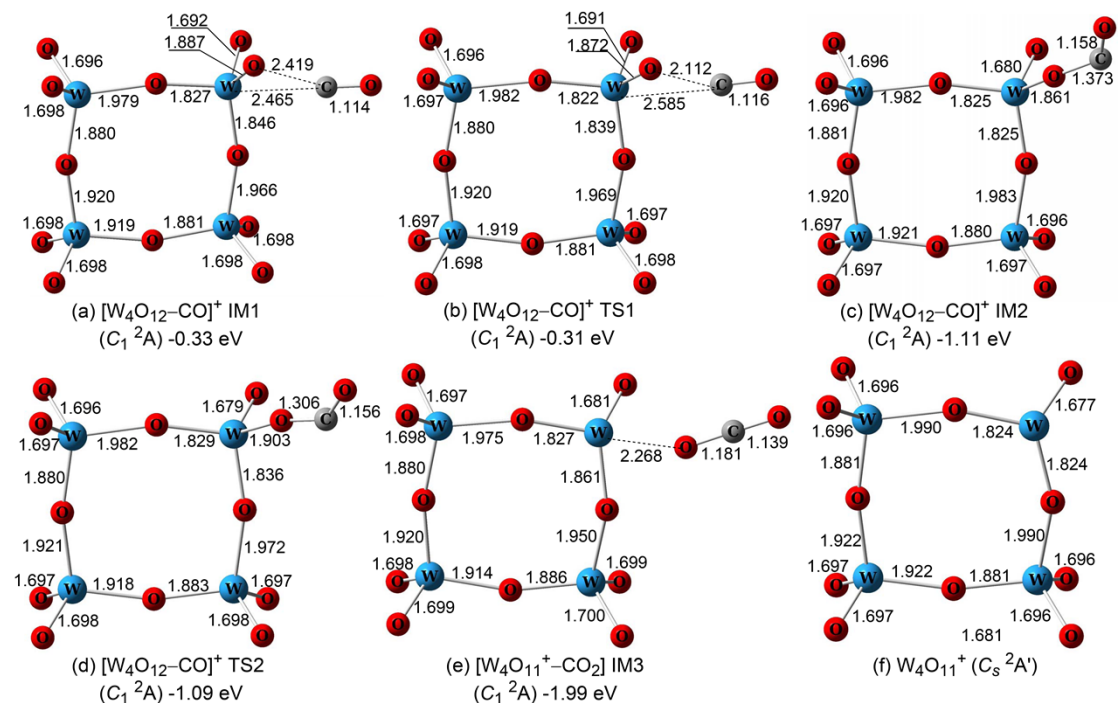

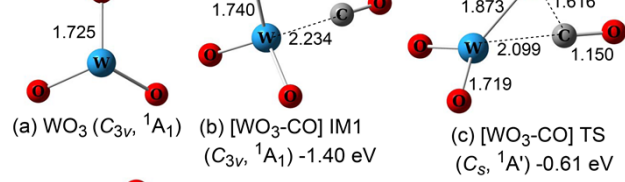

**Figure S5** B3LYP

states and the proc

(eV) take  $\text{WO}_3 + \text{C}$

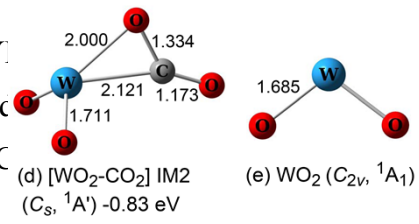

mediates, transition  
 e relative energies

**Figure S6** B3LYP optimized structures for the reactant, intermediates, transition states and the product shown in the energy profile of Figure 9. The relative energies (eV) take  $\text{WO}_3^- + \text{CO}$  as the reference.

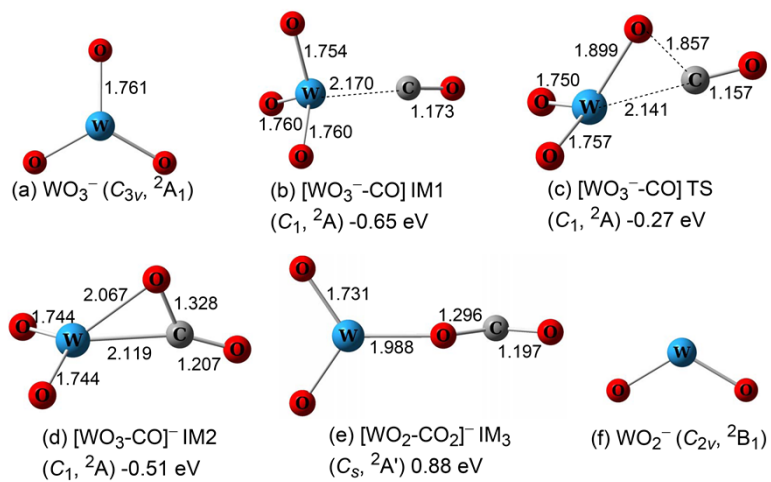



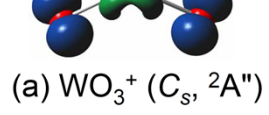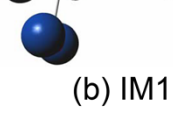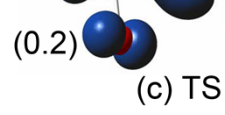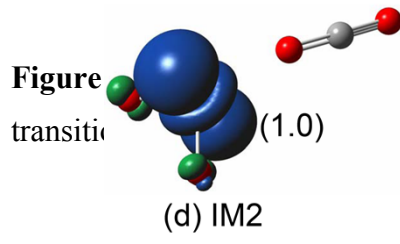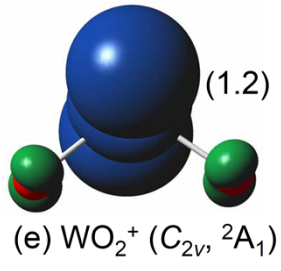

mediates,

(a)  $W_2O_6^+$  ( $C_s, ^2A'$ )

(b) IM1

(c) TS

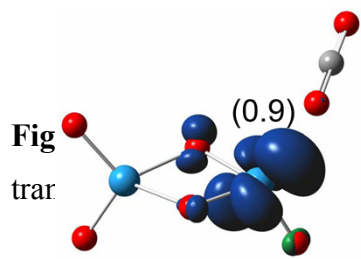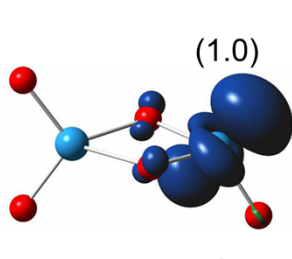

tes,

**Figure S9** Numerical electron spin density (in  $|e|$ ) for the reactant, intermediates, transition states and the product shown in the energy profile of Figure 6.

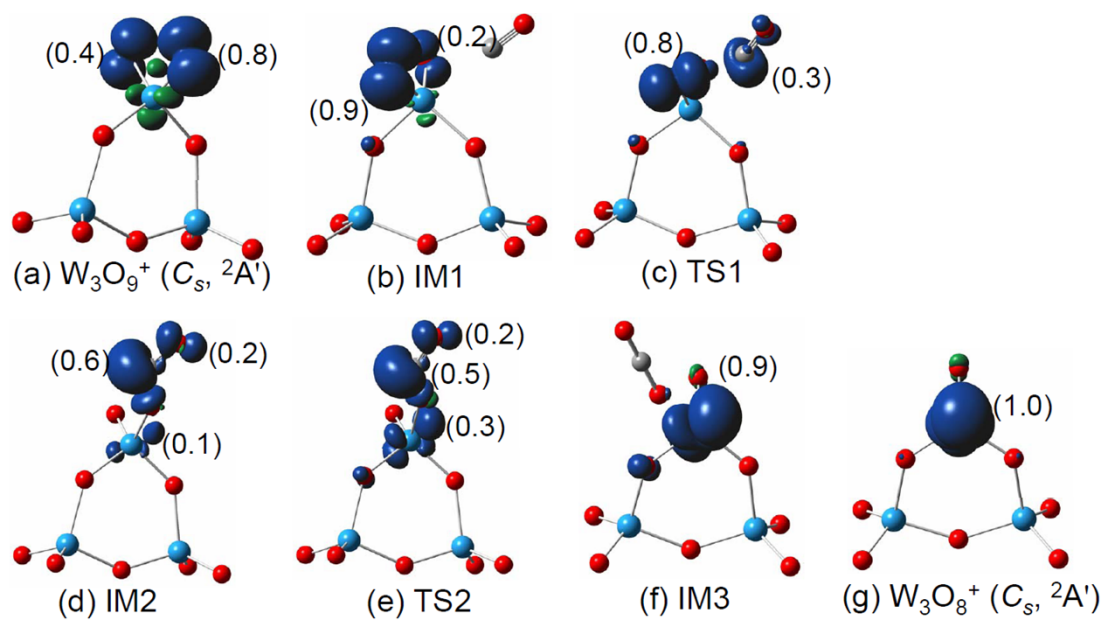

**Figure S10** Numerical electron spin density (in  $|e|$ ) for the reactant, intermediates, transition states and the product shown in the energy profile of Figure 7.

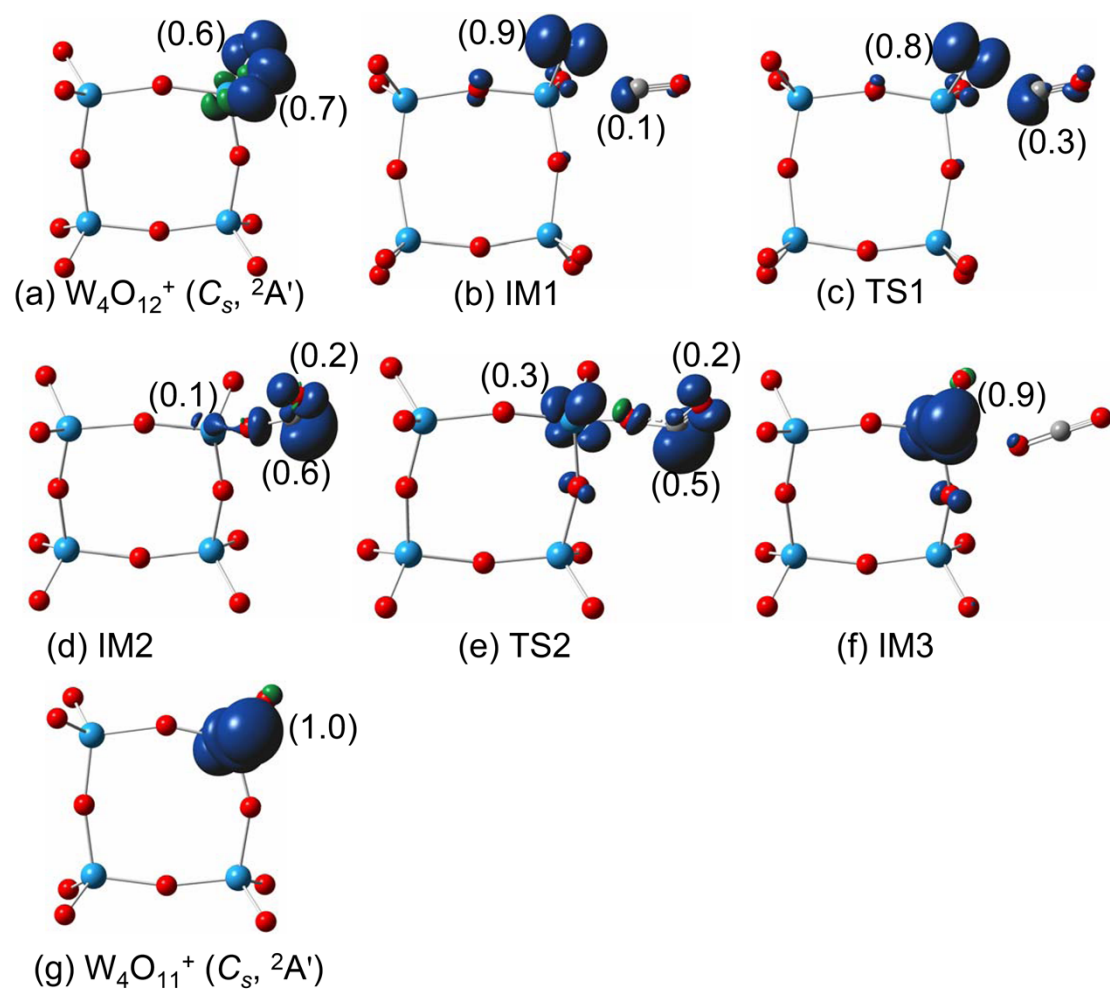

**TABLE S1** Cartesian coordinates for the reactant, intermediates, transition states and the product shown in the energy profile of Figure 4 at B3LYP level.

|                                                                                  | x          | y          | z          |
|----------------------------------------------------------------------------------|------------|------------|------------|
| <b>[a] WO<sub>3</sub><sup>+</sup> (C<sub>s</sub> <sup>2</sup>A'')</b>            |            |            |            |
| 74                                                                               | -0.1808770 | 0.0215270  | 0.0000000  |
| 8                                                                                | 0.5577040  | 0.7261190  | 1.3503030  |
| 8                                                                                | 0.5577040  | 0.7261190  | -1.3503030 |
| 8                                                                                | 0.5577040  | -1.6513590 | 0.0000000  |
| <b>[b] IM1</b>                                                                   |            |            |            |
| 74                                                                               | -0.2282650 | 0.0712200  | 0.0000000  |
| 8                                                                                | -0.8290060 | -0.7125120 | 1.3808230  |
| 8                                                                                | -0.8290060 | -0.7125120 | -1.3808230 |
| 8                                                                                | -0.8290060 | 1.8319360  | 0.0000000  |
| 6                                                                                | 2.0133880  | -0.4507200 | 0.0000000  |
| 8                                                                                | 3.0884310  | -0.7276560 | 0.0000000  |
| <b>[c] TS</b>                                                                    |            |            |            |
| 74                                                                               | -0.4308960 | 0.0321800  | 0.0000000  |
| 8                                                                                | -0.4308960 | -0.9552040 | 1.3894510  |
| 8                                                                                | -0.4308960 | -0.9552040 | -1.3894510 |
| 8                                                                                | 0.6804950  | 1.5857670  | 0.0000000  |
| 6                                                                                | 1.7426520  | 0.0503480  | 0.0000000  |
| 8                                                                                | 2.8601010  | -0.0107840 | 0.0000000  |
| <b>[d] IM2</b>                                                                   |            |            |            |
| 74                                                                               | -0.1149330 | 0.5234010  | 0.0000000  |
| 8                                                                                | 0.3799240  | 1.3971420  | 1.3501820  |
| 8                                                                                | 0.3799240  | 1.3971420  | -1.3501820 |
| 8                                                                                | -0.1667380 | -1.6410510 | 0.0000000  |
| 6                                                                                | 0.1201240  | -2.7953340 | 0.0000000  |
| 8                                                                                | 0.3799240  | -3.8981920 | 0.0000000  |
| <b>[e] WO<sub>2</sub><sup>+</sup> (C<sub>2v</sub> <sup>2</sup>A<sub>1</sub>)</b> |            |            |            |
| 74                                                                               | 0.0000000  | 0.0000000  | 0.1844200  |
| 8                                                                                | 0.0000000  | 1.3089790  | -0.8529450 |
| 8                                                                                | 0.0000000  | -1.3089790 | -0.8529450 |

**TABLE S2** Cartesian coordinates for the reactant, intermediates, transition states and the product shown in the energy profile of Figure 5 at B3LYP level.

|                                                                                  | x          | y          | z          |
|----------------------------------------------------------------------------------|------------|------------|------------|
| <b>[a] W<sub>2</sub>O<sub>6</sub><sup>+</sup> (C<sub>s</sub> <sup>2</sup>A')</b> |            |            |            |
| 74                                                                               | 0.0030000  | 1.4430910  | 0.0000000  |
| 8                                                                                | 0.0030000  | 0.0882020  | 1.2606910  |
| 8                                                                                | 0.0030000  | 0.0882020  | -1.2606910 |
| 74                                                                               | -0.0039030 | -1.4736430 | 0.0000000  |
| 8                                                                                | -1.4095670 | 2.3936120  | 0.0000000  |
| 8                                                                                | 1.4182240  | 2.6125980  | 0.0000000  |
| 8                                                                                | 1.3750660  | -2.4495210 | 0.0000000  |
| 8                                                                                | -1.3813620 | -2.4504900 | 0.0000000  |
| <b>[b] IM1</b>                                                                   |            |            |            |
| 74                                                                               | -1.2299770 | -0.3631620 | 0.0115070  |
| 8                                                                                | -0.0144400 | 1.1147660  | 0.0791410  |
| 8                                                                                | 0.3468480  | -1.3409590 | -0.0984150 |
| 74                                                                               | 1.6778120  | 0.1308480  | -0.0104000 |
| 8                                                                                | -2.0075890 | -0.8304330 | 1.4478440  |
| 8                                                                                | -2.2836960 | -0.9664180 | -1.3963530 |
| 8                                                                                | 2.6103550  | 0.4217230  | -1.3955830 |
| 8                                                                                | 2.6559300  | 0.2216410  | 1.3698660  |
| 6                                                                                | -2.7274440 | 1.5116000  | -0.0135190 |
| 8                                                                                | -3.4043000 | 2.3948830  | -0.0066040 |
| <b>[c] TS</b>                                                                    |            |            |            |
| 74                                                                               | 1.1736280  | -0.3608760 | 0.1224440  |
| 8                                                                                | 0.0144730  | 0.7172110  | -0.8762570 |
| 8                                                                                | -0.3695330 | -0.9418150 | 0.9669890  |
| 74                                                                               | -1.6966050 | 0.1565400  | -0.0385950 |
| 8                                                                                | 1.8200750  | -1.5955960 | -0.8295480 |
| 8                                                                                | 2.4703690  | 0.4305850  | 1.2421380  |
| 8                                                                                | -2.5120420 | 1.3582480  | 0.8303500  |
| 8                                                                                | -2.7920210 | -0.6640940 | -1.0319770 |
| 6                                                                                | 3.0552840  | 1.0979080  | -0.4627490 |
| 8                                                                                | 3.9147630  | 1.7621370  | -0.7302360 |
| <b>[d] IM2</b>                                                                   |            |            |            |
| 74                                                                               | 1.6509470  | 0.2967520  | 0.0307640  |
| 8                                                                                | 0.5902600  | -1.0781850 | -0.9299730 |
| 8                                                                                | -0.1611140 | 0.7983230  | 0.6337280  |
| 74                                                                               | -1.0618930 | -0.6758410 | -0.1554620 |

|   |            |            |            |
|---|------------|------------|------------|
| 8 | 2.7118140  | -0.2630130 | 1.2292340  |
| 8 | 2.4158390  | 1.4868850  | -0.9068610 |
| 8 | -2.7998670 | 0.6688200  | -0.2915060 |
| 8 | -1.5752130 | -1.8051450 | 0.9745740  |
| 6 | -3.4290270 | 1.6045610  | 0.0712970  |
| 8 | -4.0586960 | 2.4954680  | 0.3907860  |

[e] W<sub>2</sub>O<sub>5</sub><sup>+</sup> (C<sub>s</sub> <sup>1</sup>A')

|    |            |            |            |
|----|------------|------------|------------|
| 74 | 0.1507240  | -1.5324040 | 0.0000000  |
| 8  | 0.1507240  | -0.1947310 | 1.2772960  |
| 8  | 0.1507240  | -0.1947310 | -1.2772960 |
| 74 | -0.0255900 | 1.3467610  | 0.0000000  |
| 8  | -1.1982670 | -2.5296500 | 0.0000000  |
| 8  | -1.5012040 | 2.1695690  | 0.0000000  |
| 8  | 1.2405380  | 2.4667430  | 0.0000000  |

**TABLE S3** Cartesian coordinates for the reactant, intermediates, transition states and the product shown in the energy profile of Figure 6 at B3LYP level.

|                                                                                  | x          | y          | z          |
|----------------------------------------------------------------------------------|------------|------------|------------|
| <b>[a] W<sub>3</sub>O<sub>9</sub><sup>+</sup> (C<sub>s</sub> <sup>2</sup>A')</b> |            |            |            |
| 74                                                                               | -0.0023370 | 1.0388190  | 1.7972640  |
| 8                                                                                | -0.0206470 | -0.9231350 | 1.4525680  |
| 74                                                                               | 0.0031060  | -2.0404300 | 0.0000000  |
| 8                                                                                | -0.0206470 | -0.9231350 | -1.4525680 |
| 74                                                                               | -0.0023370 | 1.0388190  | -1.7972640 |
| 8                                                                                | -0.0039010 | 1.6720560  | 0.0000000  |
| 8                                                                                | -1.3659130 | 1.5454740  | 2.6642560  |
| 8                                                                                | 1.3744630  | 1.5275390  | 2.6530510  |
| 8                                                                                | -1.3385540 | -3.2423110 | 0.0000000  |
| 8                                                                                | 1.3811430  | -3.0736800 | 0.0000000  |
| 8                                                                                | -1.3659130 | 1.5454740  | -2.6642560 |
| 8                                                                                | 1.3744630  | 1.5275390  | -2.6530510 |
| <b>[b] IM1</b>                                                                   |            |            |            |
| 74                                                                               | -1.9695240 | -1.0718800 | -0.0188650 |
| 8                                                                                | -0.0669460 | -1.6087670 | -0.0259670 |
| 74                                                                               | 1.6590100  | -0.9870510 | 0.0438370  |
| 8                                                                                | 1.2163860  | 0.8289710  | -0.0192030 |
| 74                                                                               | -0.3106340 | 2.0615820  | -0.0029400 |
| 8                                                                                | -1.7569250 | 0.8181270  | -0.0141370 |
| 8                                                                                | -2.7872300 | -1.6341630 | -1.3945720 |
| 8                                                                                | -2.7903400 | -1.6364620 | 1.3522820  |
| 8                                                                                | 2.4353270  | -1.9850720 | -1.3288650 |
| 8                                                                                | 2.2921830  | -1.5314370 | 1.5208960  |
| 8                                                                                | -0.3002550 | 3.0672910  | -1.3695420 |
| 8                                                                                | -0.3042150 | 3.0451340  | 1.3791850  |
| 6                                                                                | 3.8873110  | 0.0767790  | -0.1378860 |
| 8                                                                                | 4.8921490  | 0.5542690  | -0.2004530 |
| <b>[c] TS1</b>                                                                   |            |            |            |
| 74                                                                               | -1.8840650 | -1.2234060 | -0.0722370 |
| 8                                                                                | 0.0520500  | -1.6561570 | -0.0065740 |
| 74                                                                               | 1.6715800  | -0.8164750 | 0.1393600  |
| 8                                                                                | 1.1826520  | 0.9615460  | 0.0237690  |
| 74                                                                               | -0.4620790 | 2.0512830  | 0.0004770  |
| 8                                                                                | -1.7805560 | 0.6766450  | -0.0916450 |
| 8                                                                                | -2.6278130 | -1.8498920 | -1.4602510 |
| 8                                                                                | -2.7211330 | -1.8087720 | 1.2791270  |



|   |            |            |            |
|---|------------|------------|------------|
| 8 | 2.7791960  | -1.4761850 | -1.2186850 |
| 8 | 2.2985690  | -1.1387730 | 1.6758670  |
| 8 | -0.5055020 | 3.0860370  | -1.3415450 |
| 8 | -0.6182690 | 2.9985360  | 1.3974920  |
| 6 | 4.0650860  | -0.0684270 | -0.3650900 |
| 8 | 5.1317040  | 0.1528700  | -0.6090340 |

[d] IM2

|    |            |            |            |
|----|------------|------------|------------|
| 74 | -1.2542980 | 1.7934860  | 0.1080340  |
| 8  | 0.6798080  | 1.4302760  | -0.1630290 |
| 74 | 1.7883370  | -0.0090620 | -0.4085000 |
| 8  | 0.6670140  | -1.4393080 | -0.1646400 |
| 74 | -1.2679510 | -1.7886380 | 0.1082740  |
| 8  | -1.9028220 | 0.0056000  | 0.2079030  |
| 8  | -1.5362810 | 2.6664610  | 1.5325680  |
| 8  | -1.9370220 | 2.6578390  | -1.1785620 |
| 8  | 3.2410020  | 0.0148940  | 0.7568470  |
| 8  | 2.3463120  | -0.0165220 | -1.9931060 |
| 8  | -1.5577470 | -2.6579010 | 1.5332920  |
| 8  | -1.9587120 | -2.6474980 | -1.1776720 |
| 6  | 4.5027150  | 0.3798750  | 1.1440020  |
| 8  | 5.3701040  | -0.2597720 | 1.5661750  |

[e] TS2

|    |            |            |            |
|----|------------|------------|------------|
| 74 | -1.2325090 | 1.7955390  | 0.1241280  |
| 8  | 0.6859780  | 1.4245600  | -0.1695970 |
| 74 | 1.7859980  | -0.0218050 | -0.4780600 |
| 8  | 0.6715620  | -1.4486370 | -0.1909980 |
| 74 | -1.2644560 | -1.7839360 | 0.1206800  |
| 8  | -1.8923590 | 0.0085060  | 0.2267410  |
| 8  | -1.4837270 | 2.6639170  | 1.5584150  |
| 8  | -1.9261380 | 2.6721550  | -1.1491990 |
| 8  | 3.2941400  | 0.1761240  | 0.6554920  |
| 8  | 2.2774190  | 0.0099540  | -2.0825410 |
| 8  | -1.5236790 | -2.6497930 | 1.5542760  |
| 8  | -1.9803350 | -2.6467490 | -1.1491640 |
| 6  | 4.3350750  | 0.3127700  | 1.4381230  |
| 8  | 5.2022710  | -0.3502490 | 1.8255700  |

[f] IM3

|    |            |            |            |
|----|------------|------------|------------|
| 74 | 0.3779160  | 2.0419430  | 0.0381240  |
| 8  | -1.1958270 | 0.8845940  | -0.0334650 |
| 74 | -1.5316910 | -0.9450950 | 0.1841730  |
| 8  | 0.1184980  | -1.7149640 | -0.0490760 |

|    |            |            |            |
|----|------------|------------|------------|
| 74 | 2.0057530  | -1.1279540 | -0.1428160 |
| 8  | 1.7873900  | 0.7601800  | -0.1105210 |
| 8  | 0.3627930  | 3.1568250  | -1.2421660 |
| 8  | 0.4509270  | 2.9084510  | 1.4958360  |
| 8  | -3.5087440 | -0.3849470 | -0.7320250 |
| 8  | -2.2127450 | -1.4075270 | 1.6493200  |
| 8  | 2.7488940  | -1.6685320 | -1.5688980 |
| 8  | 2.9113110  | -1.6973800 | 1.1726890  |
| 6  | -4.6890970 | -0.3412720 | -0.7360070 |
| 8  | -5.8264780 | -0.2930140 | -0.7648840 |

[g]  $W_3O_8^+$  ( $C_s$   $^2A'$ )

|    |            |            |            |
|----|------------|------------|------------|
| 74 | -0.9280550 | -0.0165910 | 1.8064430  |
| 8  | -1.5378550 | -0.0153440 | 0.0000000  |
| 74 | -0.9280550 | -0.0165910 | -1.8064430 |
| 8  | 1.0306270  | 0.2092640  | -1.5054390 |
| 74 | 2.0713090  | 0.1518650  | 0.0000000  |
| 8  | 1.0306270  | 0.2092640  | 1.5054390  |
| 8  | -1.5723880 | 1.2572810  | 2.7177310  |
| 8  | -1.2876110 | -1.4663390 | 2.6037700  |
| 8  | -1.5723880 | 1.2572810  | -2.7177310 |
| 8  | -1.2876110 | -1.4663390 | -2.6037700 |
| 8  | 3.2060120  | -1.0828860 | 0.0000000  |

**TABLE S4** Cartesian coordinates for the reactant, intermediates, transition states and the product shown in the energy profile of Figure 7 at B3LYP level.

|                                                                                  | x          | y          | z          |
|----------------------------------------------------------------------------------|------------|------------|------------|
| [a] W <sub>4</sub> O <sub>12</sub> <sup>+</sup> (C <sub>s</sub> <sup>2</sup> A') |            |            |            |
| 8                                                                                | 0.0045730  | -1.4945640 | 1.5171880  |
| 8                                                                                | 0.0364560  | 1.5855160  | -1.4833020 |
| 8                                                                                | 0.0364560  | 1.5855160  | 1.4833020  |
| 8                                                                                | 0.0045730  | -1.4945640 | -1.5171880 |
| 74                                                                               | 0.0095850  | -2.6741340 | 0.0000000  |
| 74                                                                               | 0.0083850  | 2.6477580  | 0.0000000  |
| 74                                                                               | -0.0068940 | -0.0086860 | 2.6690070  |
| 74                                                                               | -0.0068940 | -0.0086860 | -2.6690070 |
| 8                                                                                | -1.3548670 | -3.6829390 | 0.0000000  |
| 8                                                                                | -1.3620890 | 3.7055600  | 0.0000000  |
| 8                                                                                | -1.4003800 | 0.0152590  | 3.6350330  |
| 8                                                                                | -1.4003800 | 0.0152590  | -3.6350330 |
| 8                                                                                | 1.3389700  | -0.0083800 | -3.7008030 |
| 8                                                                                | 1.3389700  | -0.0083800 | 3.7008030  |
| 8                                                                                | 1.3326350  | 3.8525870  | 0.0000000  |
| 8                                                                                | 1.3863980  | -3.6661980 | 0.0000000  |
| [b] IM1                                                                          |            |            |            |
| 8                                                                                | 2.1079720  | 0.9561450  | -0.0437870 |
| 8                                                                                | -1.7723210 | -0.8730100 | -0.0380220 |
| 8                                                                                | -0.8391070 | 1.8501590  | -0.0702560 |
| 8                                                                                | 1.1349340  | -1.9139220 | -0.0239790 |
| 74                                                                               | 2.7367030  | -0.8577020 | -0.0578690 |
| 74                                                                               | -2.3745210 | 0.8692910  | 0.0591570  |
| 74                                                                               | 1.0299220  | 2.4953700  | 0.0092020  |
| 74                                                                               | -0.6554580 | -2.4885210 | 0.0419300  |
| 8                                                                                | 3.7180330  | -1.1801360 | 1.2892430  |
| 8                                                                                | -3.0443730 | 1.1887270  | 1.5799560  |
| 8                                                                                | 1.2858260  | 3.3779640  | 1.4347490  |
| 8                                                                                | -0.9787800 | -3.3430970 | 1.4729750  |
| 8                                                                                | -1.0380760 | -3.5050110 | -1.2633770 |
| 8                                                                                | 1.3399570  | 3.5287520  | -1.3013870 |
| 8                                                                                | -3.3509030 | 1.6440720  | -1.3577990 |
| 8                                                                                | 3.6504560  | -1.1755730 | -1.4530150 |
| 6                                                                                | -4.5773420 | -0.1676430 | -0.3265360 |
| 8                                                                                | -5.5945830 | -0.5998850 | -0.4652830 |

|         | x          | y          | z          |
|---------|------------|------------|------------|
| [c] TS1 |            |            |            |
| 8       | 2.0914790  | 0.9833850  | -0.0519200 |
| 8       | -1.7599110 | -0.9072300 | -0.0499270 |
| 8       | -0.8643020 | 1.8574160  | -0.1023250 |
| 8       | 1.1624630  | -1.9020120 | -0.0268840 |
| 74      | 2.7476180  | -0.8210650 | -0.0666660 |
| 74      | -2.3566200 | 0.8274140  | 0.0754970  |
| 74      | 1.0025080  | 2.5148880  | 0.0010180  |
| 74      | -0.6172490 | -2.5079020 | 0.0472020  |
| 8       | 3.7385930  | -1.1275800 | 1.2770170  |
| 8       | -2.9885190 | 1.0952320  | 1.6207060  |
| 8       | 1.2397630  | 3.3880080  | 1.4356520  |
| 8       | -0.9222780 | -3.3521120 | 1.4879340  |
| 8       | -0.9830890 | -3.5454020 | -1.2456710 |
| 8       | 1.3196590  | 3.5597890  | -1.2975940 |
| 8       | -3.5339260 | 1.3973980  | -1.2636800 |
| 8       | 3.6611260  | -1.1258550 | -1.4648360 |
| 6       | -4.7323340 | -0.0916750 | -0.3660490 |
| 8       | -5.7921800 | -0.3756300 | -0.5716570 |

|         |            |            |            |
|---------|------------|------------|------------|
| [d] IM2 |            |            |            |
| 8       | -1.6957220 | 1.5236180  | 0.0795580  |
| 8       | 1.3809820  | -1.4709620 | -0.0645830 |
| 8       | 1.3805720  | 1.4559910  | -0.0758950 |
| 8       | -1.6991690 | -1.5101540 | 0.0868510  |
| 74      | -2.8711820 | 0.0091600  | 0.1855730  |
| 74      | 2.4494600  | -0.0086810 | -0.2862670 |
| 74      | -0.1980930 | 2.6538940  | -0.0532130 |
| 74      | -0.2121880 | -2.6522910 | -0.0488670 |
| 8       | -3.9930520 | 0.0074080  | -1.0878580 |
| 8       | 3.0497820  | -0.0068670 | -1.8556350 |
| 8       | -0.2533020 | 3.5864940  | -1.4687650 |
| 8       | -0.2736840 | -3.5778840 | -1.4687440 |
| 8       | -0.1213430 | -3.7247140 | 1.2625510  |
| 8       | -0.0983190 | 3.7193050  | 1.2630340  |
| 8       | 3.8845530  | -0.0250000 | 0.8984890  |
| 8       | -3.7419490 | 0.0133920  | 1.6426460  |
| 6       | 5.1638640  | -0.3746400 | 1.2554410  |
| 8       | 6.0037760  | 0.2711010  | 1.7224290  |

|         | x          | y          | z          |
|---------|------------|------------|------------|
| [e] TS2 |            |            |            |
| 8       | -1.8415970 | 1.3315630  | 0.1451250  |
| 8       | 1.5204240  | -1.2657180 | -0.1404480 |
| 8       | 1.2191130  | 1.6535050  | -0.0875330 |
| 8       | -1.5244550 | -1.6836180 | 0.0113190  |
| 74      | -2.8483220 | -0.3043730 | 0.1713070  |
| 74      | 2.4307740  | 0.3122010  | -0.3672790 |
| 74      | -0.4972450 | 2.6392030  | 0.0076000  |
| 74      | 0.1007450  | -2.6315450 | -0.0607110 |
| 8       | -3.9565630 | -0.3655970 | -1.1130180 |
| 8       | 3.0267810  | 0.3801890  | -1.9357620 |
| 8       | -0.7035500 | 3.5927260  | -1.3801000 |
| 8       | 0.1715520  | -3.6490410 | -1.4166640 |
| 8       | 0.3202400  | -3.5938400 | 1.3211310  |
| 8       | -0.4916440 | 3.6764160  | 1.3506140  |
| 8       | 3.8993040  | 0.2101820  | 0.8381920  |
| 8       | -3.7231640 | -0.4590500 | 1.6180850  |
| 6       | 4.9452160  | -0.2240850 | 1.4885890  |
| 8       | 5.9045950  | 0.1970940  | 1.9766410  |

|         |            |            |            |
|---------|------------|------------|------------|
| [f] IM3 |            |            |            |
| 8       | -1.7688570 | -0.8128850 | -0.1065460 |
| 8       | 2.1707420  | 0.8789280  | -0.0796570 |
| 8       | 1.0917190  | -1.9559850 | -0.0090410 |
| 8       | -0.7209680 | 1.9728230  | -0.0818390 |
| 74      | -2.2343410 | 0.9726690  | 0.1359160  |
| 74      | 2.7240080  | -0.9593910 | -0.0811150 |
| 74      | -0.7266310 | -2.4514140 | 0.0742170  |
| 74      | 1.1872060  | 2.4813290  | -0.0459970 |
| 8       | -2.9929630 | 1.3668160  | 1.5837720  |
| 8       | 3.7176400  | -1.3033280 | 1.2526400  |
| 8       | -1.0930540 | -3.2070500 | 1.5514900  |
| 8       | 1.5227980  | 3.3811400  | 1.3532400  |
| 8       | 1.5334330  | 3.4610080  | -1.3889600 |
| 8       | -1.1474780 | -3.5211800 | -1.1781930 |
| 8       | 3.5992400  | -1.3267960 | -1.4899730 |
| 8       | -4.1803920 | 0.2576430  | -0.7836380 |
| 6       | -5.3616560 | 0.2461520  | -0.7822160 |
| 8       | -6.5003560 | 0.2247290  | -0.8045670 |

|                                                                                  | x          | y          | z          |
|----------------------------------------------------------------------------------|------------|------------|------------|
| [g] W <sub>4</sub> O <sub>11</sub> <sup>+</sup> (C <sub>s</sub> <sup>2</sup> A') |            |            |            |
| 8                                                                                | -1.6914640 | -0.2433630 | 1.5513940  |
| 8                                                                                | 1.3818870  | -0.0146710 | -1.5193080 |
| 8                                                                                | 1.3818870  | -0.0146710 | 1.5193080  |
| 8                                                                                | -1.6914640 | -0.2433630 | -1.5513940 |
| 74                                                                               | -2.6440910 | -0.1374800 | 0.0000000  |
| 74                                                                               | 2.5585210  | 0.0141650  | 0.0000000  |
| 74                                                                               | -0.0841400 | 0.0029960  | 2.6978640  |
| 74                                                                               | -0.0841400 | 0.0029960  | -2.6978640 |
| 8                                                                                | -3.8028540 | 1.0753550  | 0.0000000  |
| 8                                                                                | 3.5348210  | 1.4019620  | 0.0000000  |
| 8                                                                                | -0.1798270 | 1.4748290  | 3.5345810  |
| 8                                                                                | -0.1798270 | 1.4748290  | -3.5345810 |
| 8                                                                                | 0.0058730  | -1.2434630 | -3.8447210 |
| 8                                                                                | 0.0058730  | -1.2434630 | 3.8447210  |
| 8                                                                                | 3.5831940  | -1.3387460 | 0.0000000  |

**TABLE S5** Cartesian coordinates for the reactant, intermediates, transition states and the product shown in the energy profile of Figure 8 at B3LYP level.

|                                                                    | x          | y          | z          |
|--------------------------------------------------------------------|------------|------------|------------|
| [a] WO <sub>3</sub> (C <sub>3v</sub> <sup>1</sup> A <sub>1</sub> ) |            |            |            |
| 74                                                                 | 0.0000000  | 0.0000000  | 0.1529910  |
| 8                                                                  | 0.0000000  | 1.6078470  | -0.4717210 |
| 8                                                                  | -1.3924360 | -0.8039230 | -0.4717210 |
| 8                                                                  | 1.3924360  | -0.8039230 | -0.4717210 |
| [b] IM1                                                            |            |            |            |
| 74                                                                 | 0.0000000  | 0.0000000  | 0.2629610  |
| 8                                                                  | 0.0000000  | 1.6813410  | 0.7110110  |
| 8                                                                  | 1.4560840  | -0.8406700 | 0.7110110  |
| 8                                                                  | -1.4560840 | -0.8406700 | 0.7110110  |
| 6                                                                  | 0.0000000  | 0.0000000  | -1.9710750 |
| 8                                                                  | 0.0000000  | 0.0000000  | -3.0871190 |
| [c] TS                                                             |            |            |            |
| 74                                                                 | 0.0151920  | 0.3235060  | 0.0000000  |
| 8                                                                  | -0.4121300 | 1.1537060  | 1.4435580  |
| 8                                                                  | -0.4121300 | 1.1537060  | -1.4435580 |
| 8                                                                  | 1.2540950  | -1.0815580 | 0.0000000  |
| 6                                                                  | -0.2109800 | -1.7634740 | 0.0000000  |
| 8                                                                  | -0.4121300 | -2.8956840 | 0.0000000  |
| [d] IM2                                                            |            |            |            |
| 74                                                                 | -0.1024460 | 0.3768560  | 0.0000000  |
| 8                                                                  | 0.6747230  | 0.9482640  | 1.4136510  |
| 8                                                                  | 0.6747230  | 0.9482640  | -1.4136510 |
| 8                                                                  | -1.1589040 | -1.3210250 | 0.0000000  |
| 6                                                                  | 0.1098080  | -1.7336960 | 0.0000000  |
| 8                                                                  | 0.6747230  | -2.7611510 | 0.0000000  |
| [e] WO <sub>2</sub> (C <sub>2v</sub> <sup>1</sup> A <sub>1</sub> ) |            |            |            |
| 74                                                                 | 0.0000000  | 0.0000000  | 0.1834410  |
| 8                                                                  | 0.0000000  | 1.3319750  | -0.8484150 |
| 8                                                                  | 0.0000000  | -1.3319750 | -0.8484150 |

**TABLE S6** Cartesian coordinates for the reactant, intermediates, transition states and the product shown in the energy profile of Figure 9 at B3LYP level.

|                                                                                  | x          | y          | z          |
|----------------------------------------------------------------------------------|------------|------------|------------|
| [a] WO <sub>3</sub> <sup>-</sup> (C <sub>3v</sub> <sup>-2</sup> A <sub>1</sub> ) |            |            |            |
| 74                                                                               | 0.0000000  | 0.0000000  | 0.0895520  |
| 8                                                                                | 0.0000000  | 1.7222690  | -0.2761180 |
| 8                                                                                | -1.4915280 | -0.8611340 | -0.2761180 |
| 8                                                                                | 1.4915280  | -0.8611340 | -0.2761180 |
| [b] IM1                                                                          |            |            |            |
| 74                                                                               | 0.2398420  | 0.0000000  | 0.0007710  |
| 8                                                                                | 0.6993350  | -1.4822580 | -0.8291190 |
| 8                                                                                | 0.8133390  | -0.0001650 | 1.6586610  |
| 8                                                                                | 0.6994360  | 1.4823720  | -0.8288610 |
| 6                                                                                | -1.9139990 | 0.0000640  | -0.2646660 |
| 8                                                                                | -2.9951500 | 0.0000010  | 0.1906830  |
| [b] TS                                                                           |            |            |            |
| 74                                                                               | -0.3101060 | 0.0095330  | -0.0203770 |
| 8                                                                                | 0.9839780  | -0.7860110 | 1.1192380  |
| 8                                                                                | -1.5556080 | -1.1339280 | -0.4982110 |
| 8                                                                                | -0.8774140 | 1.6451220  | 0.2374480  |
| 6                                                                                | 1.8117840  | 0.0836380  | -0.2974120 |
| 8                                                                                | 2.9586830  | 0.1239130  | -0.4469230 |
| [c] IM2                                                                          |            |            |            |
| 74                                                                               | -0.0004780 | 0.3505370  | 0.0000000  |
| 8                                                                                | -0.4092150 | 1.1474980  | 1.4969030  |
| 8                                                                                | -0.4092150 | 1.1474980  | -1.4969030 |
| 8                                                                                | 1.2373200  | -1.3043990 | 0.0000000  |
| 6                                                                                | -0.0070040 | -1.7685470 | 0.0000000  |
| 8                                                                                | -0.4092150 | -2.9066550 | 0.0000000  |
| [d] IM3                                                                          |            |            |            |
| 74                                                                               | 0.0329260  | 0.4758300  | 0.0000000  |
| 8                                                                                | -0.0292300 | 1.4301590  | 1.4423980  |
| 8                                                                                | -0.0292300 | 1.4301590  | -1.4423980 |
| 8                                                                                | 0.1374270  | -1.5090040 | 0.0000000  |
| 6                                                                                | -0.4724020 | -2.6519980 | 0.0000000  |
| 8                                                                                | -0.0292300 | -3.7637400 | 0.0000000  |



|                                                                                 | x         | y          | z          |
|---------------------------------------------------------------------------------|-----------|------------|------------|
| [e] WO <sub>2</sub> <sup>-</sup> (C <sub>2v</sub> <sup>2</sup> B <sub>1</sub> ) |           |            |            |
| 74                                                                              | 0.0000000 | 0.0000000  | 0.1625690  |
| 8                                                                               | 0.0000000 | 1.4736540  | -0.7518790 |
| 8                                                                               | 0.0000000 | -1.4736540 | -0.7518790 |
